# Supplementary material for: What do the arc magmatism trace element patterns and Sr-Nd-Pb isotopic data reflect: Insight from the Urumieh-Dokhtar magmatic arc of Iran
Source: Copernicus journal article supplement (doi:10.5194/egusphere-2024-3097), 2024-11-19

**b**

LILE-rich series

|                               |             |
|-------------------------------|-------------|
| ● Primitive samples           | ] Fordou    |
| ● Differentiated samples      |             |
| ● Primitive samples           | ] Vadghan   |
| ● Differentiated samples      |             |
| ● More differentiated samples | ] Nedoushan |
| ● Less differentiated samples |             |
| ● Mishab                      |             |

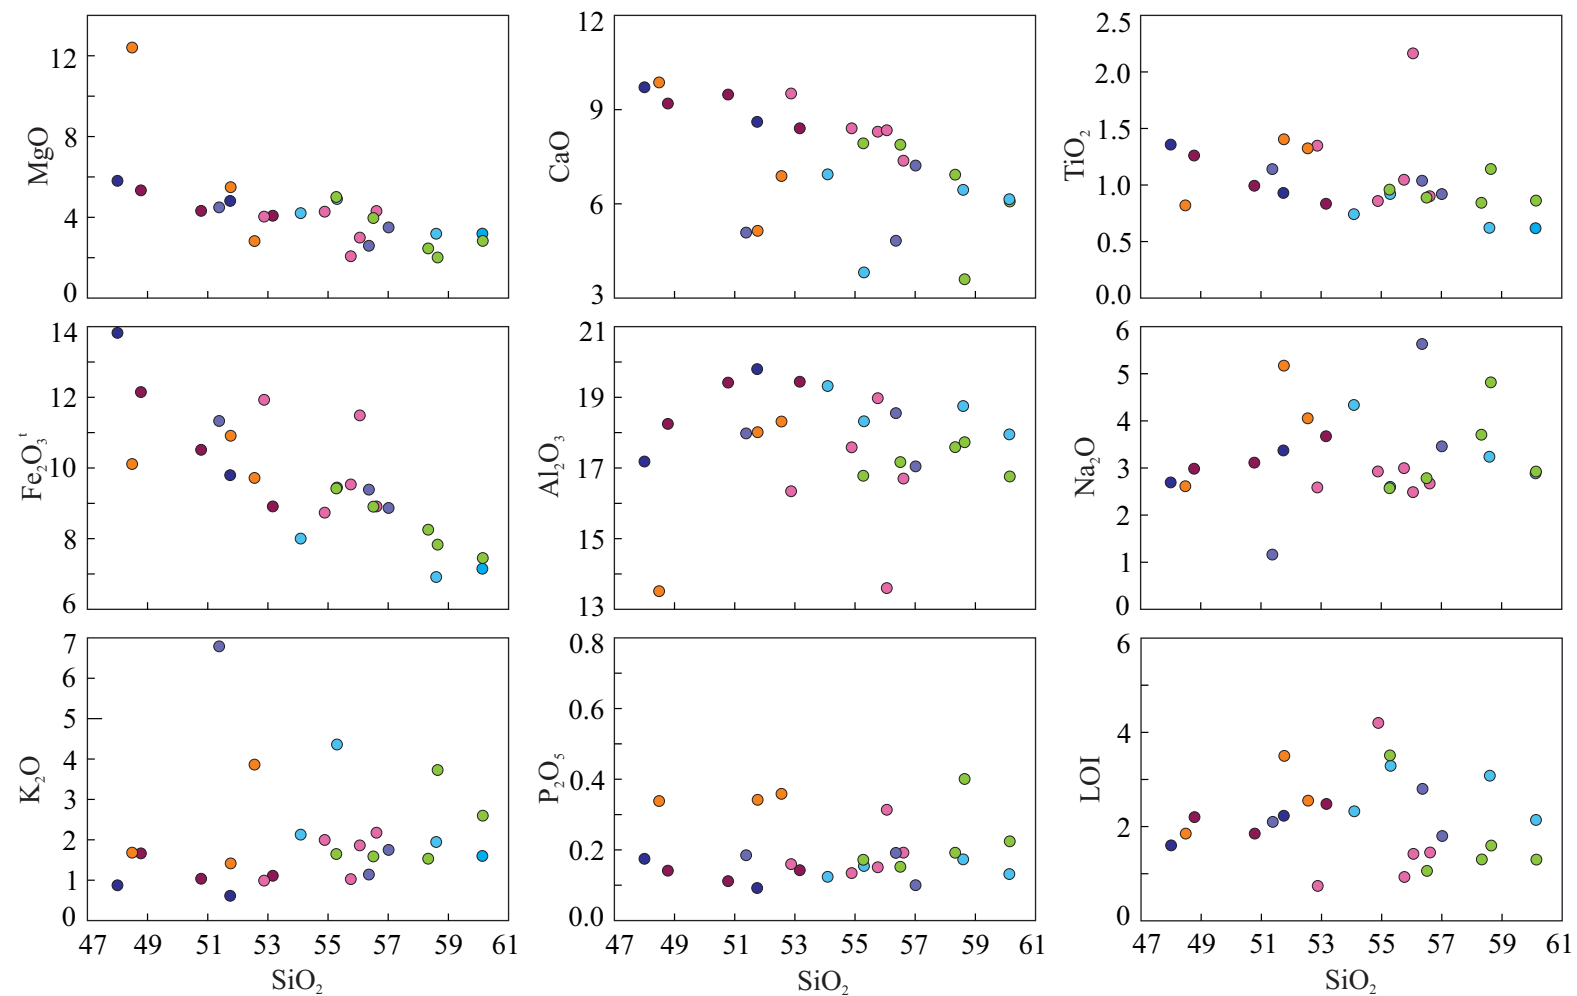

Supplement: Supplementary file 3 [file egusphere-2024-3097-supplement.zip]
