# Supplementary material for: What do the arc magmatism trace element patterns and Sr-Nd-Pb isotopic data reflect: Insight from the Urumieh-Dokhtar magmatic arc of Iran
Source: Copernicus journal article supplement (doi:10.5194/egusphere-2024-3097), 2024-11-19

**a**

LILE-poor series

- Primitive samples
- Differentiated samples

Marbin

- Primitive samples
- Differentiated samples

Kahang

- Mishab
- Differentiated samples

Fordou

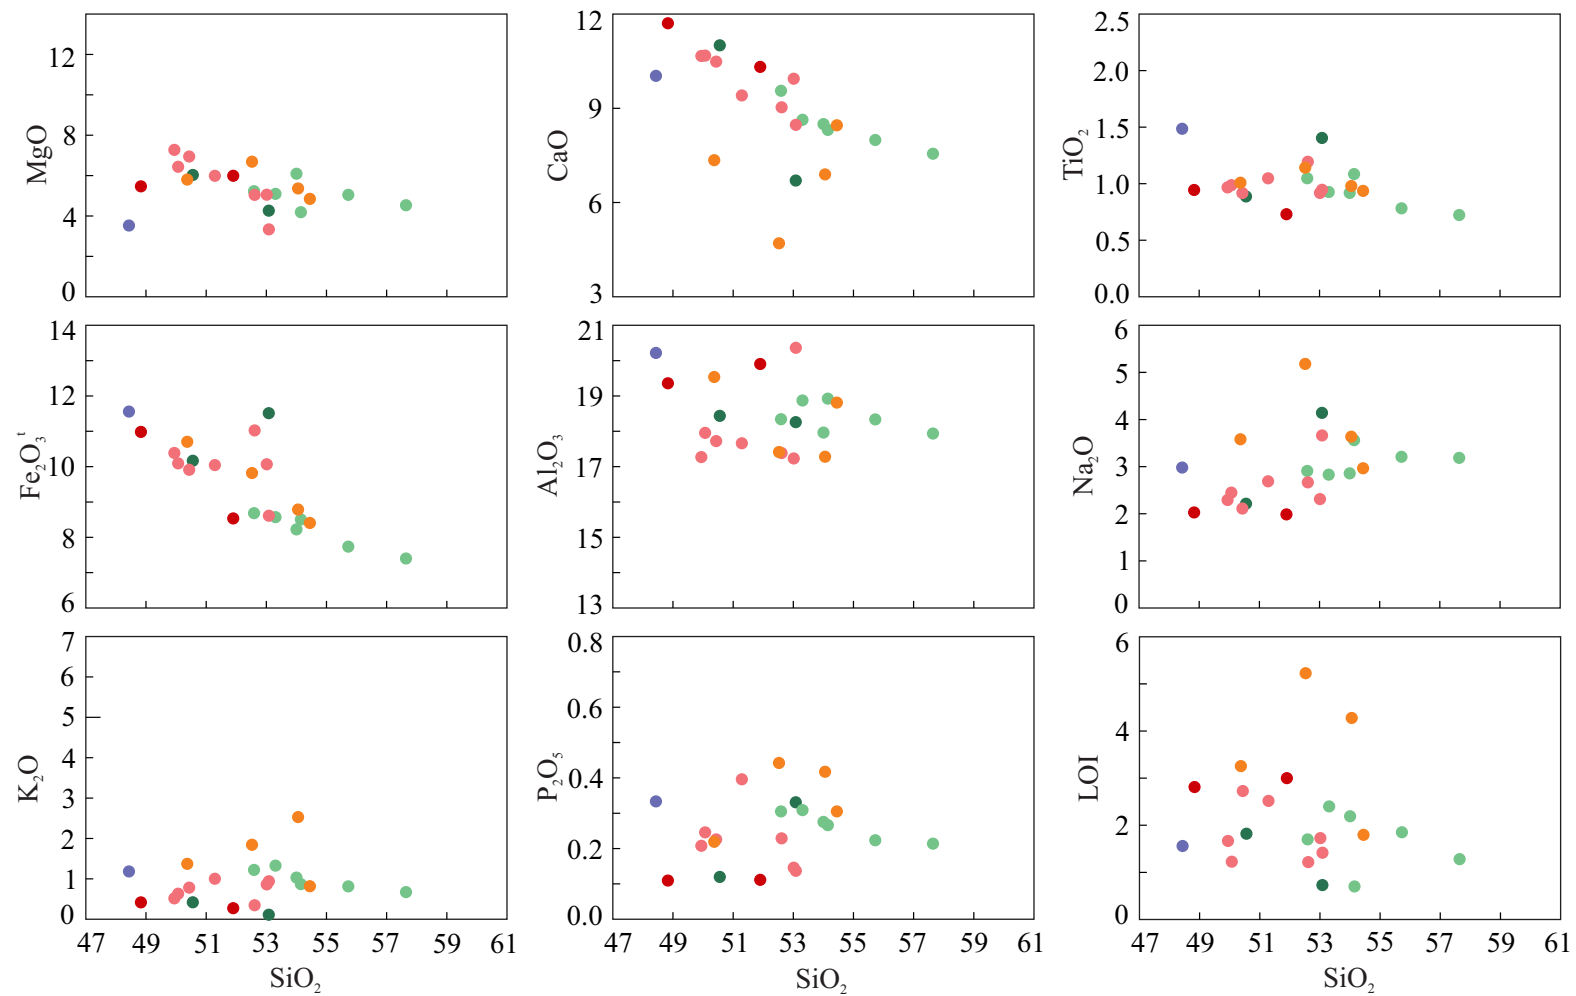

Supplement: Supplementary file 4 [file egusphere-2024-3097-supplement.zip]
