# Supplementary figures and images for: What do the arc magmatism trace element patterns and Sr-Nd-Pb isotopic data reflect: Insight from the Urumieh-Dokhtar magmatic arc of Iran
Source: Copernicus journal article supplement (doi:10.5194/egusphere-2024-3097), 2024-11-19

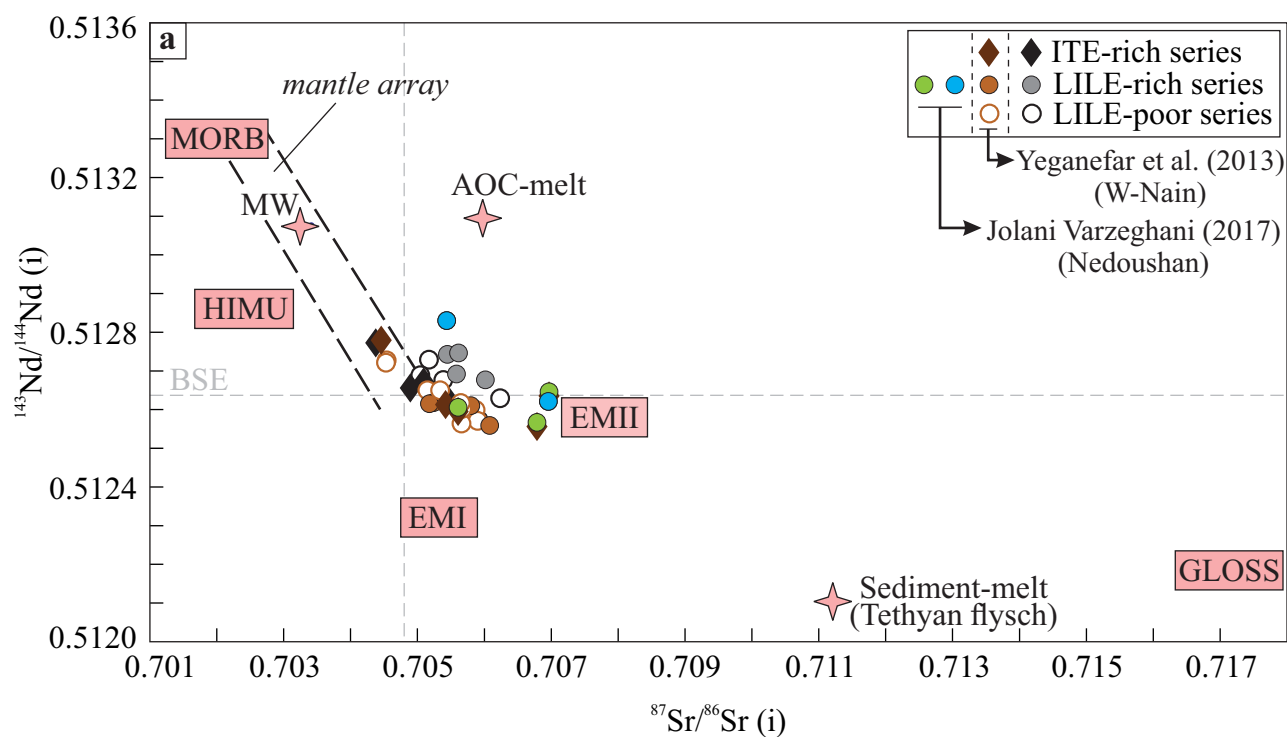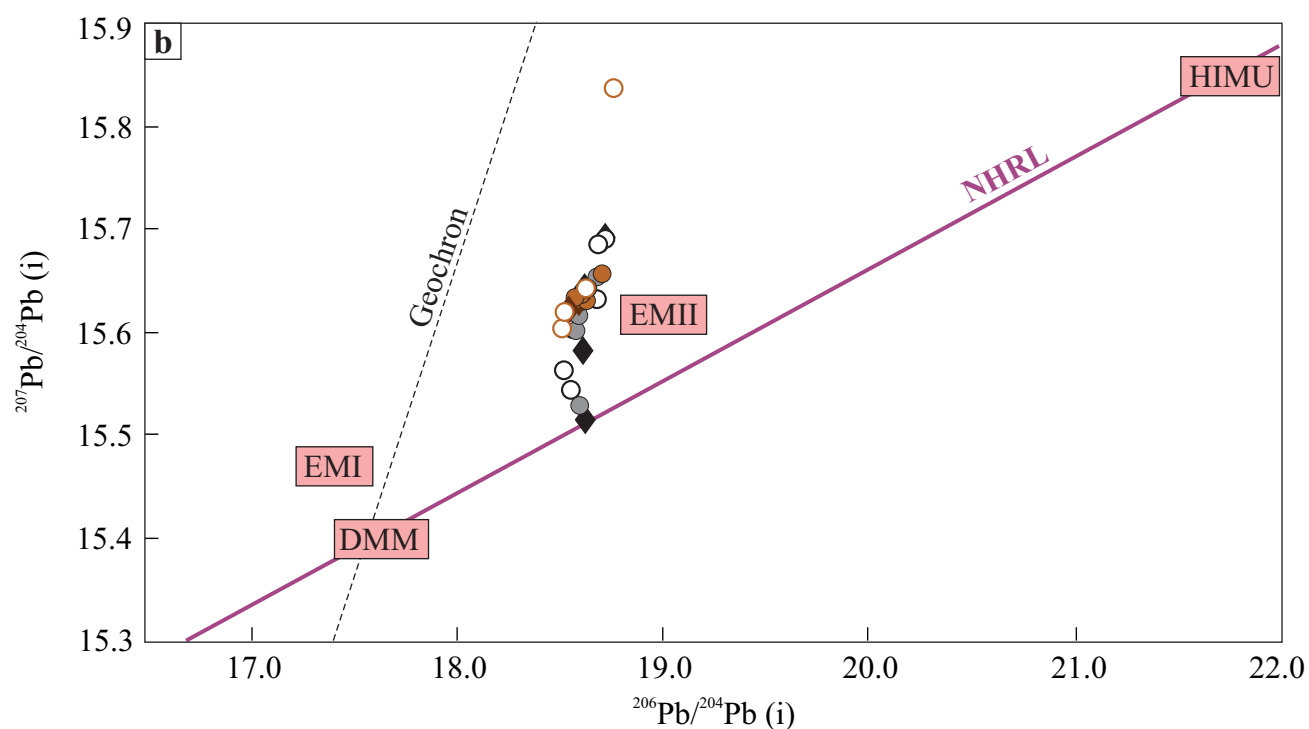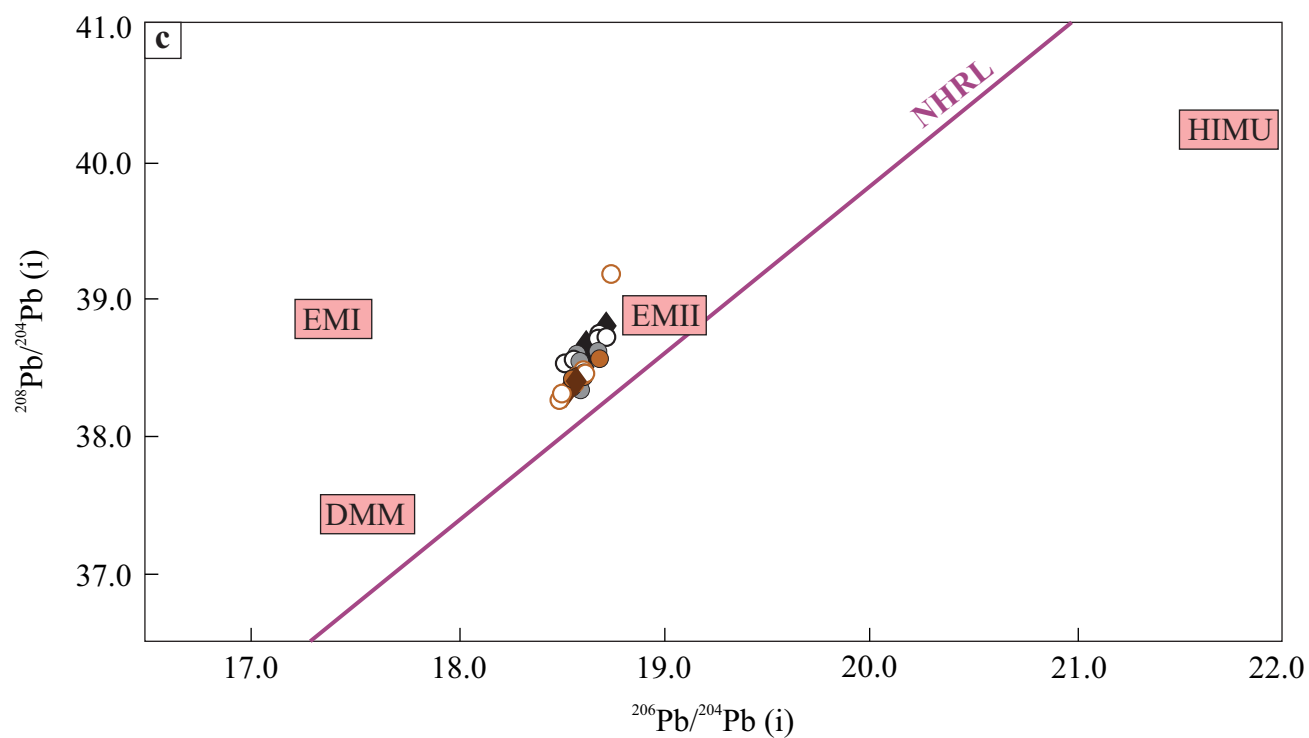

Supplement: Supplementary file 1 [file egusphere-2024-3097-supplement.zip]

**c**

ITE-rich series

◆ Fordou

◆ Vadghan

◆ Mishab

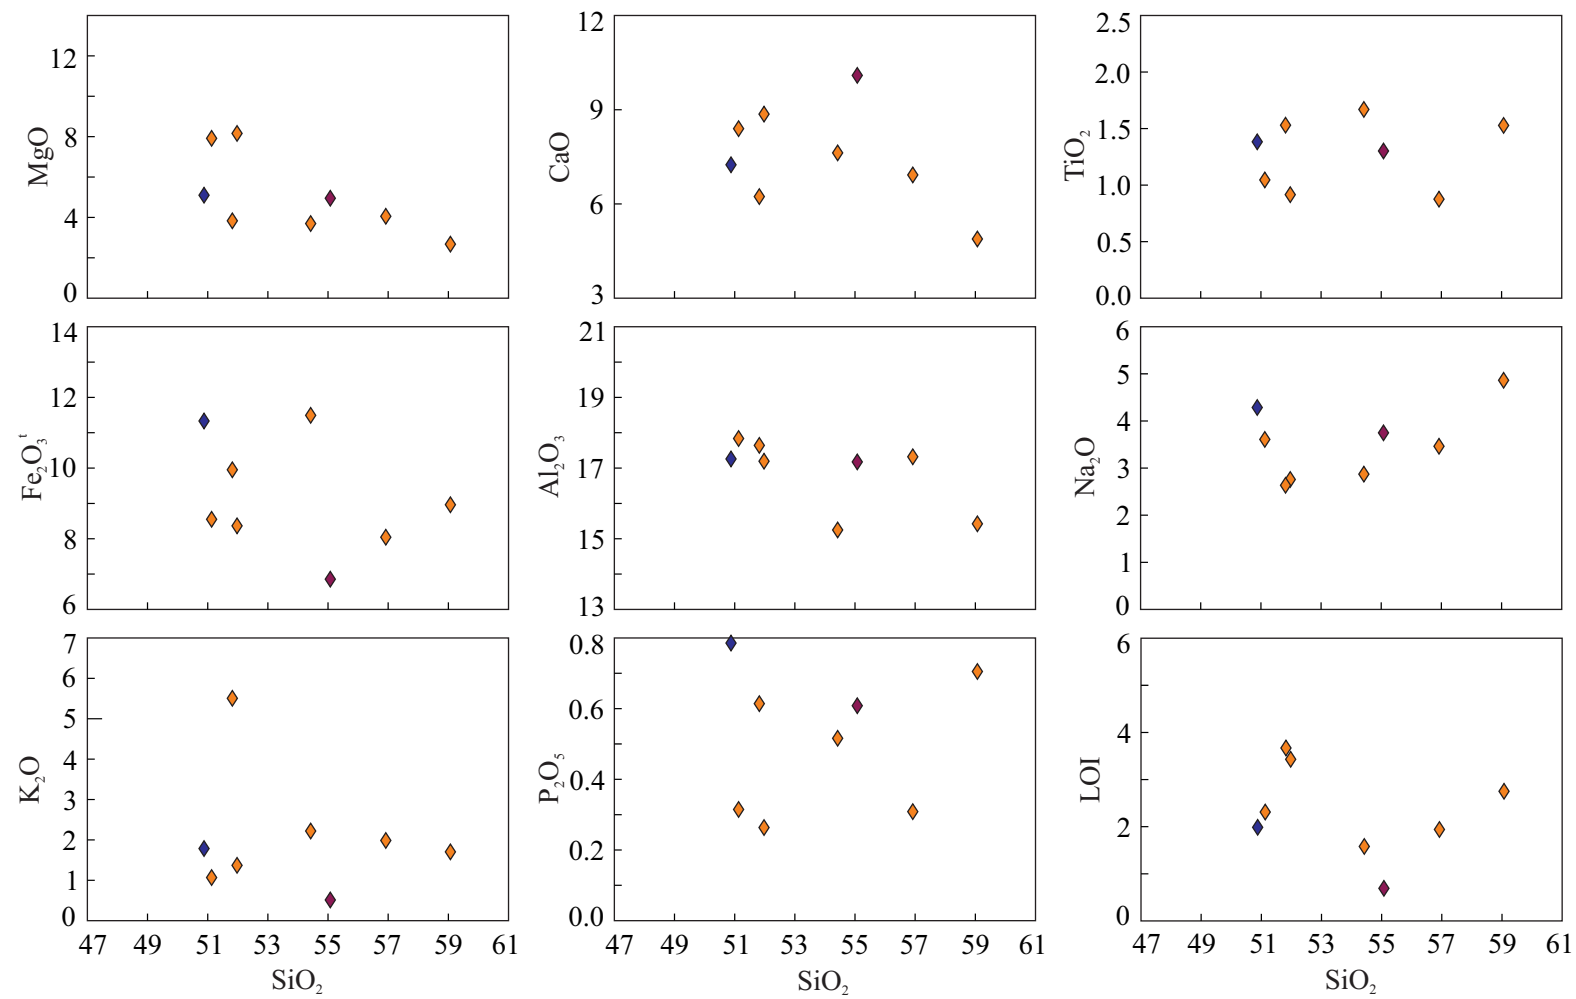

Supplement: Supplementary file 2 [file egusphere-2024-3097-supplement.zip]

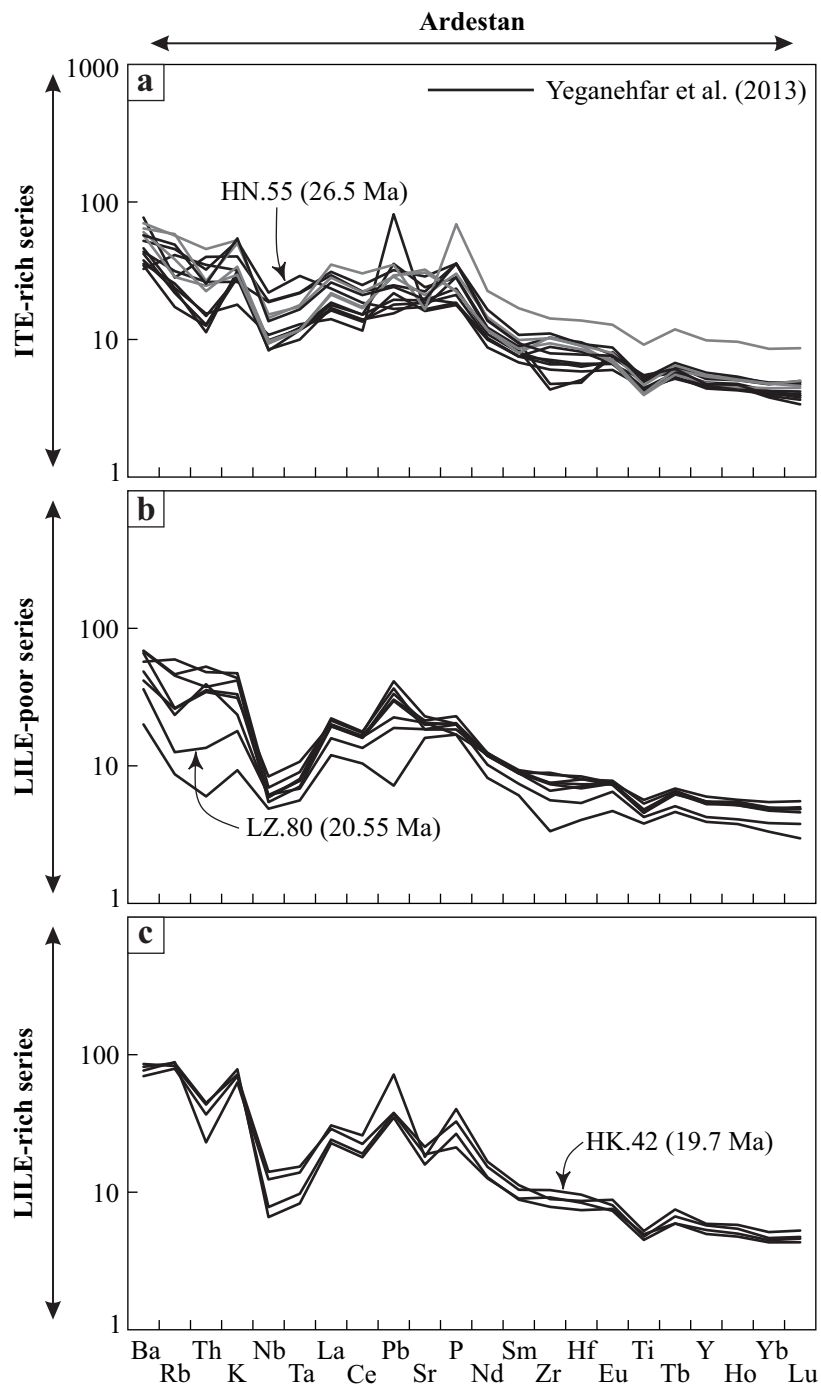

Supplement: Supplementary file 5 [file egusphere-2024-3097-supplement.zip]

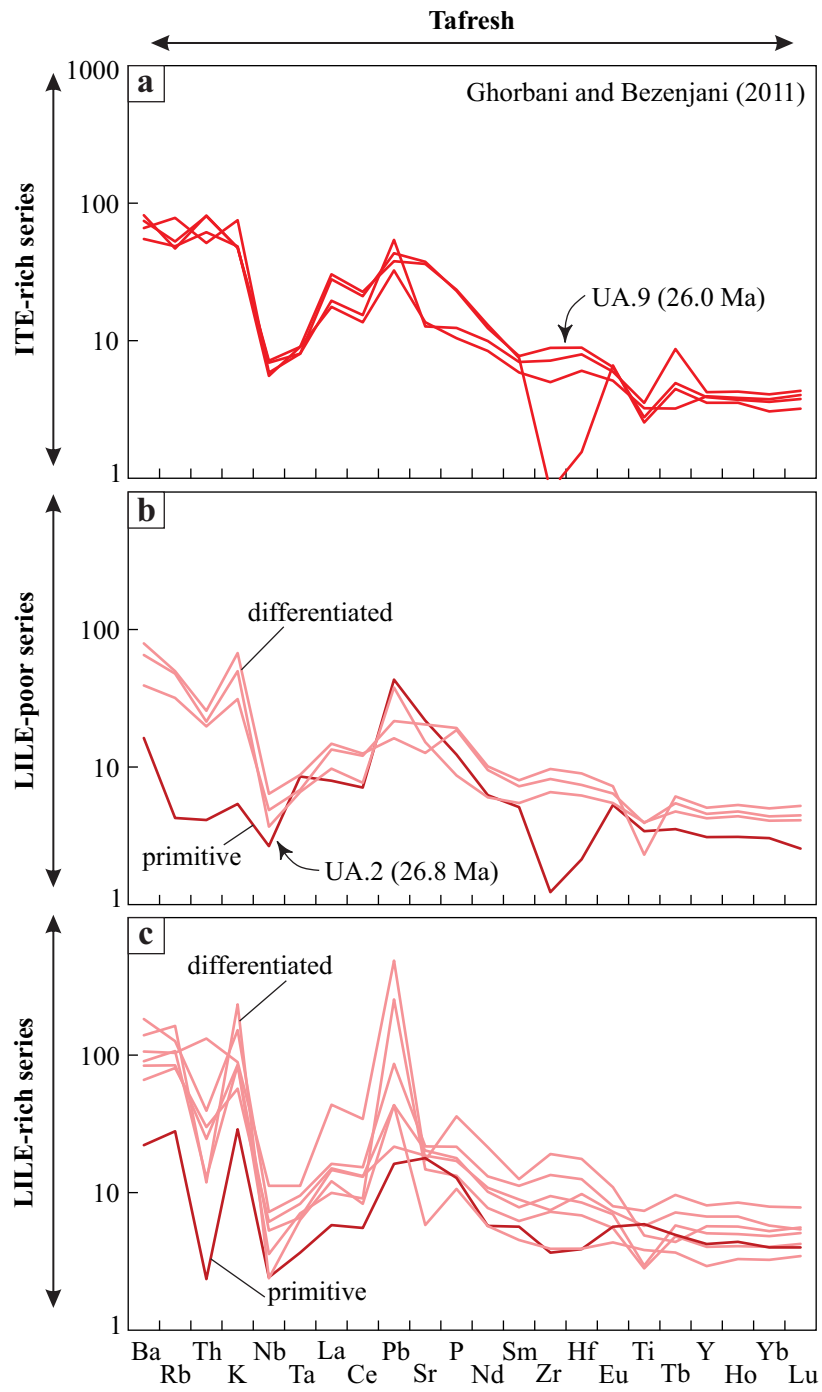

Supplement: Supplementary file 7 [file egusphere-2024-3097-supplement.zip]
